# Supplementary material for: Regioselective nitration of aromatic compounds in an aqueous sodium dodecylsulfate and nitric acid medium
Source: Royal Society of Chemistry journal article supplement (doi:10.1039/c3ra40185e), 2013-01-01
Supplement: c3ra40185e.pdf [file c3ra40185e.pdf]

## Supplementary Information

### **Regioselective nitration of aromatic compounds in an aqueous sodium dodecylsulfate and nitric acid medium**

Jahar Dey, Mithu Saha, Amarta Kumar Pal\* and Kochi Ismail\*

Department of Chemistry, North-Eastern Hill University, Shillong, India.

E-mail: [kismail@nehu.ac.in](mailto:kismail@nehu.ac.in); [kinehu@hotmail.com](mailto:kinehu@hotmail.com) or [akpal@nehu.ac.in](mailto:akpal@nehu.ac.in);  
[amartya\\_pal22@yahoo.com](mailto:amartya_pal22@yahoo.com)

## 1. $^1\text{H-NMR}$ Spectra:

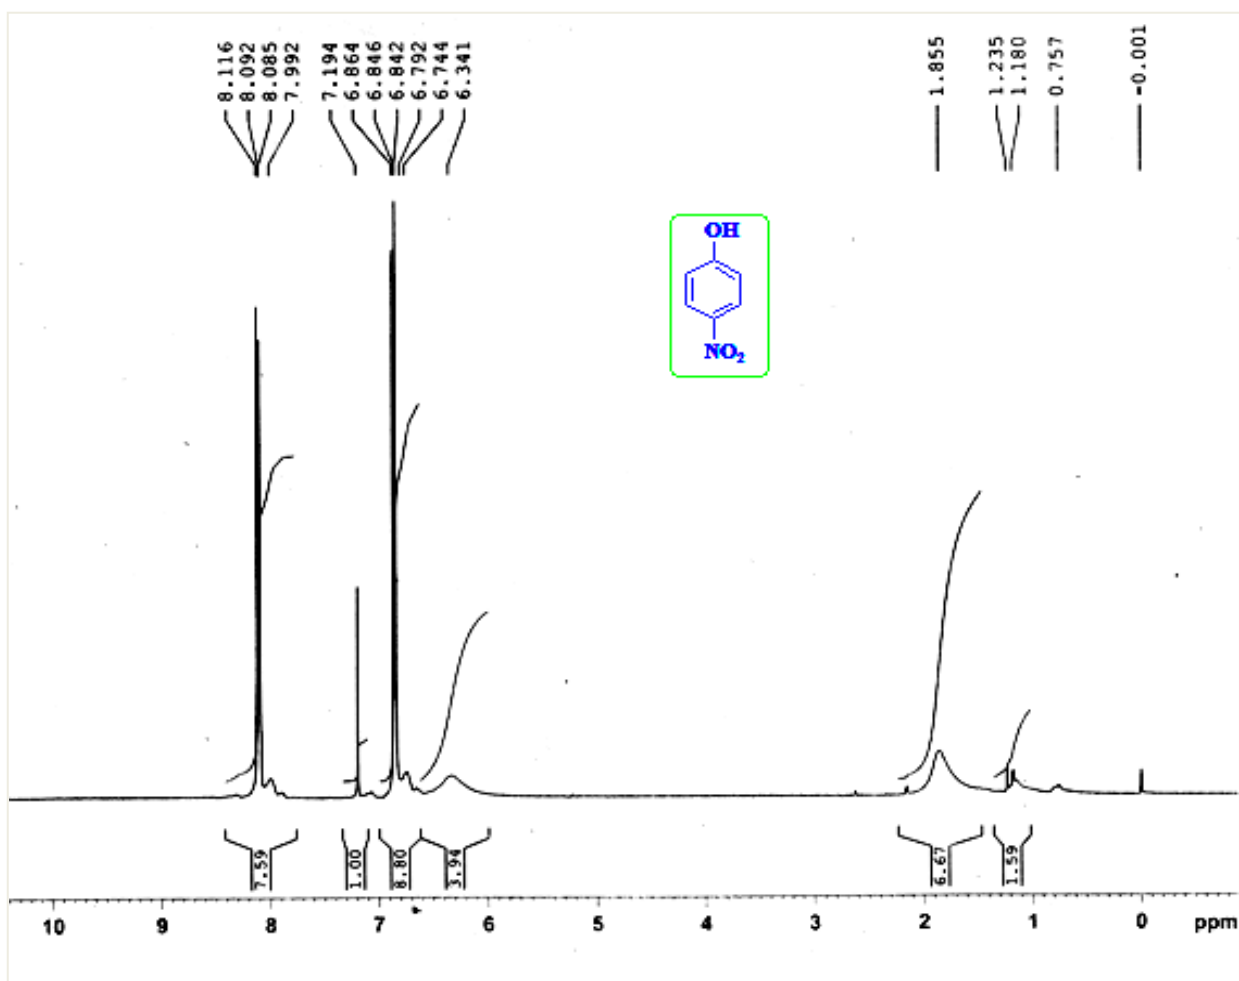

**Fig. S1:**  $^1\text{H-NMR}$  spectrum of 4-nitrophenol

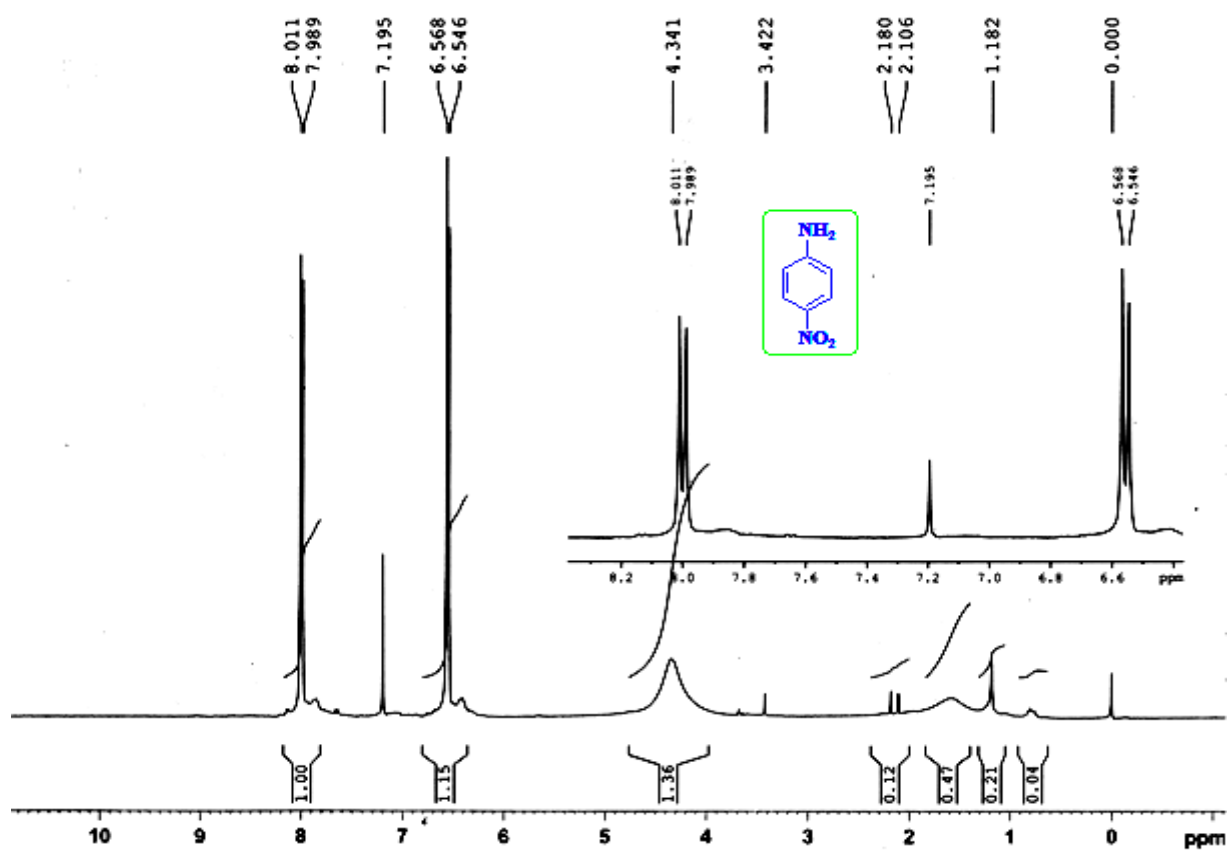

Fig. S2: <sup>1</sup>H-NMR spectrum of 4-nitroaniline

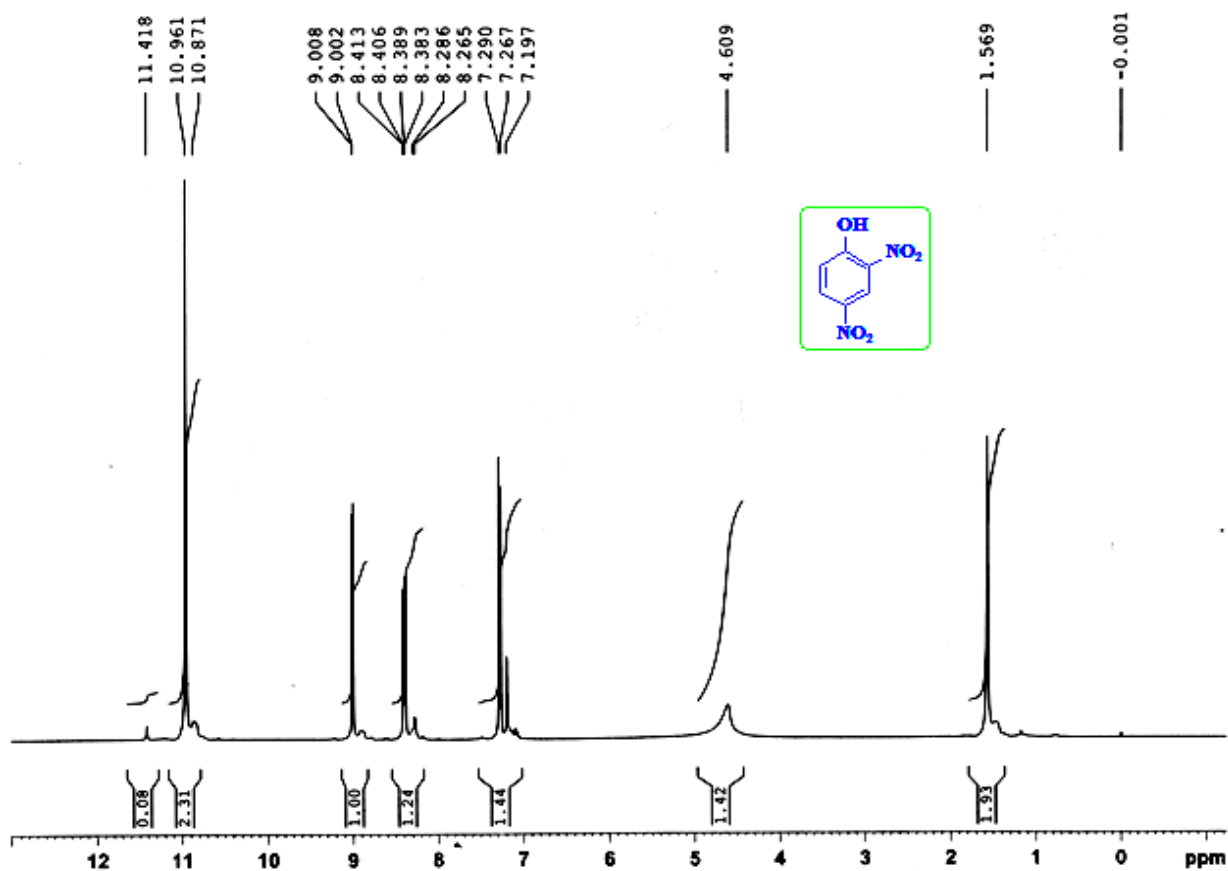

Fig. S3: <sup>1</sup>H-NMR spectrum of 2,4-dinitrophenol

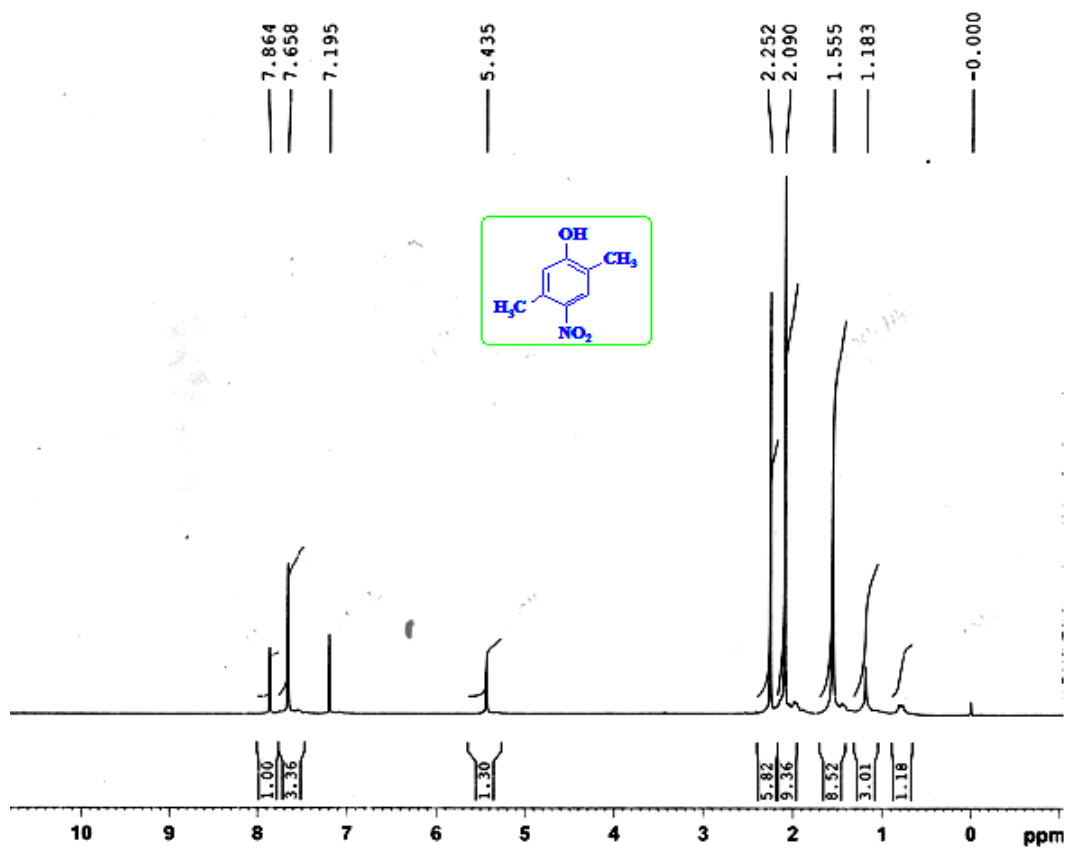

**Fig. S4:** <sup>1</sup>H-NMR spectrum of 2,5-dimethyl-4-nitrophenol

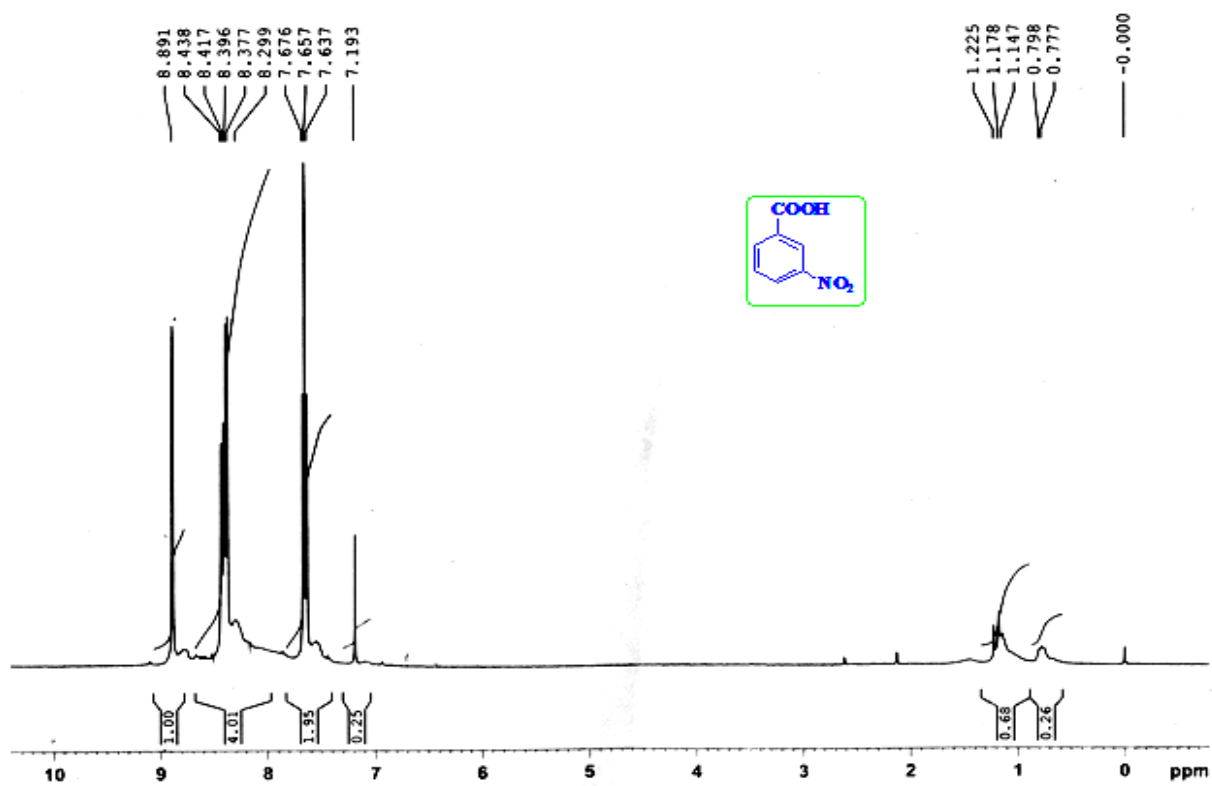

Fig. S5: <sup>1</sup>H-NMR spectrum of 3-nitrobenzoic acid

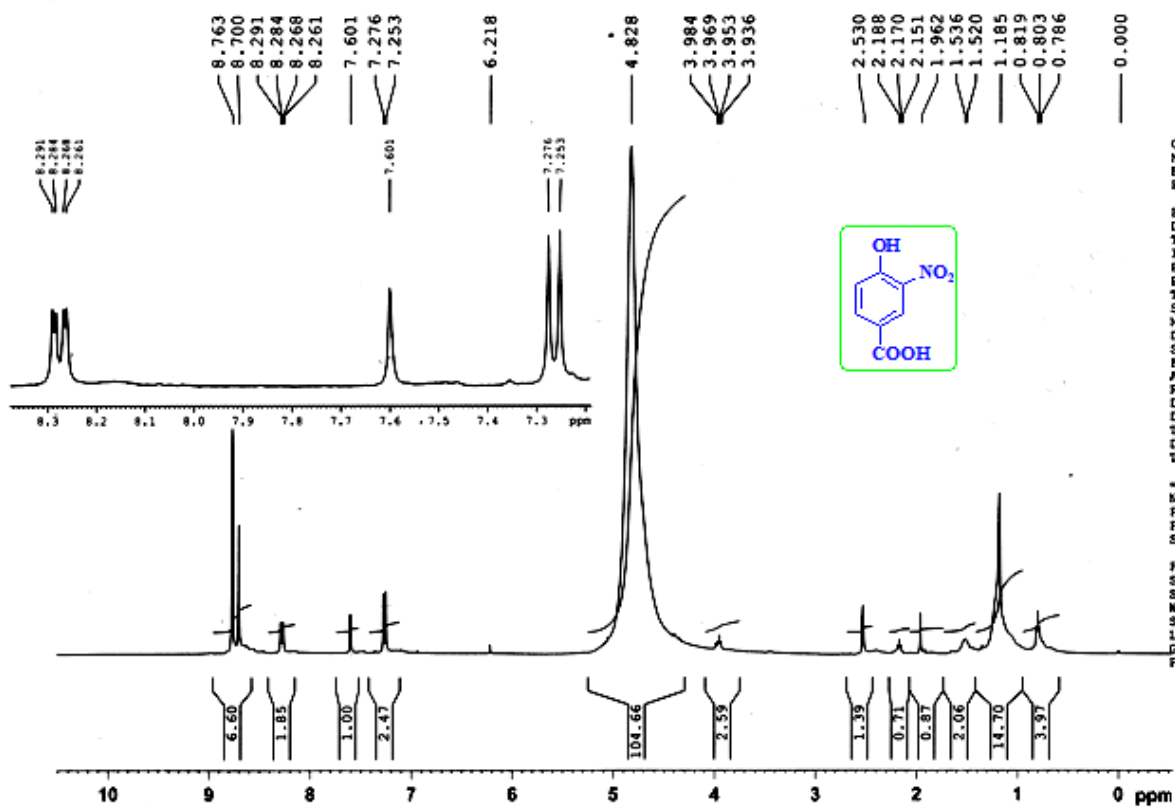

Fig. S6: <sup>1</sup>H-NMR spectrum of 4-hydroxy-3-nitrobenzoic acid

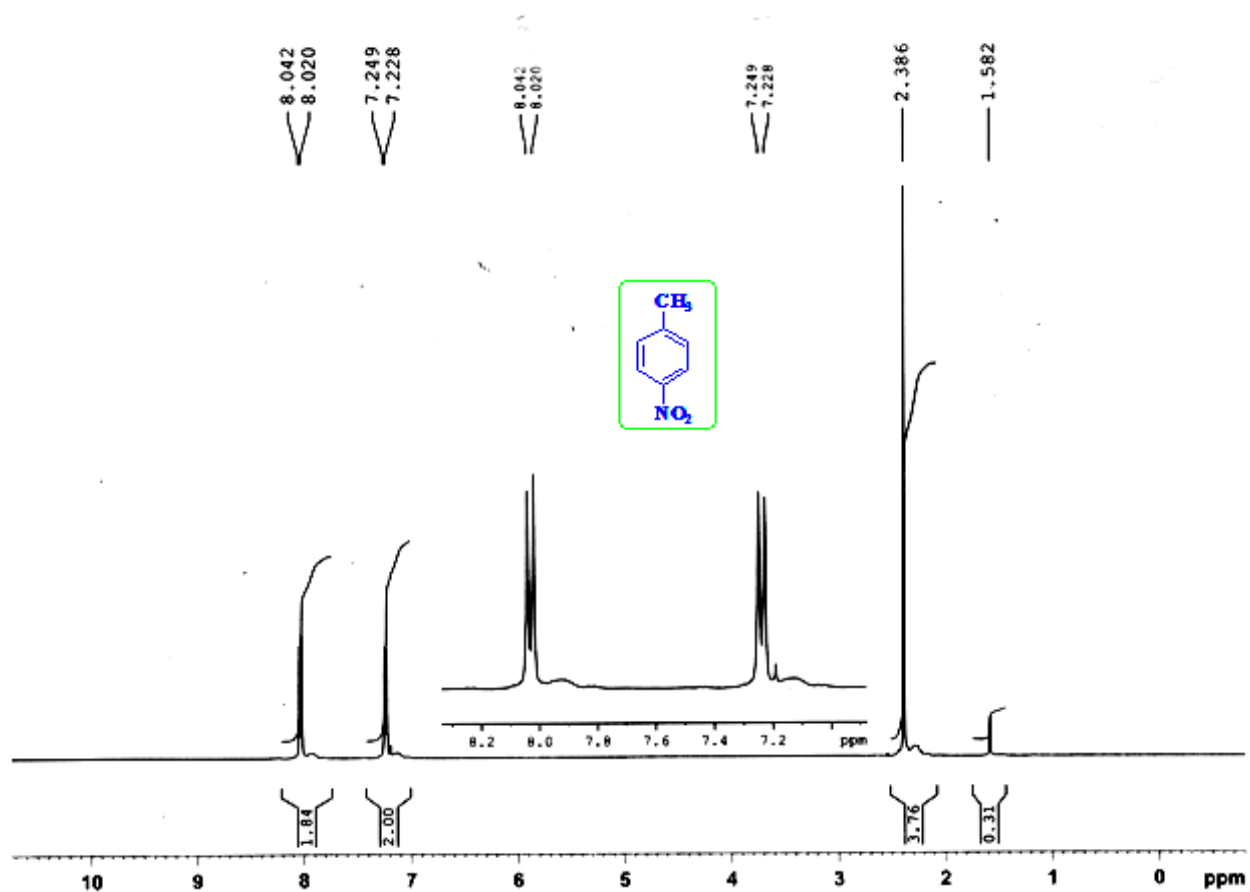

Fig. S7: <sup>1</sup>H-NMR spectrum of 4-nitrotoluene



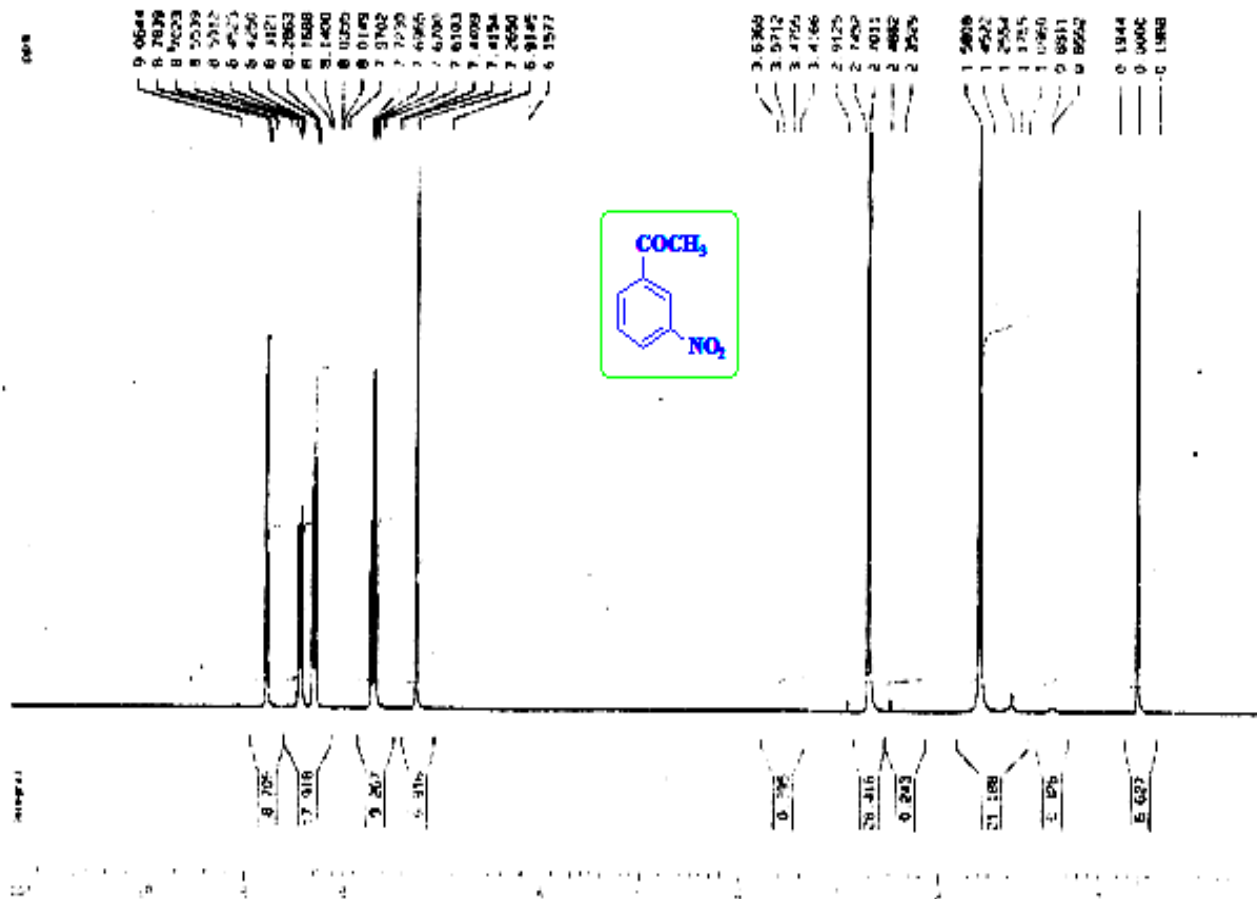

Fig. S8: <sup>1</sup>H-NMR spectrum of 3-nitroacetophenone

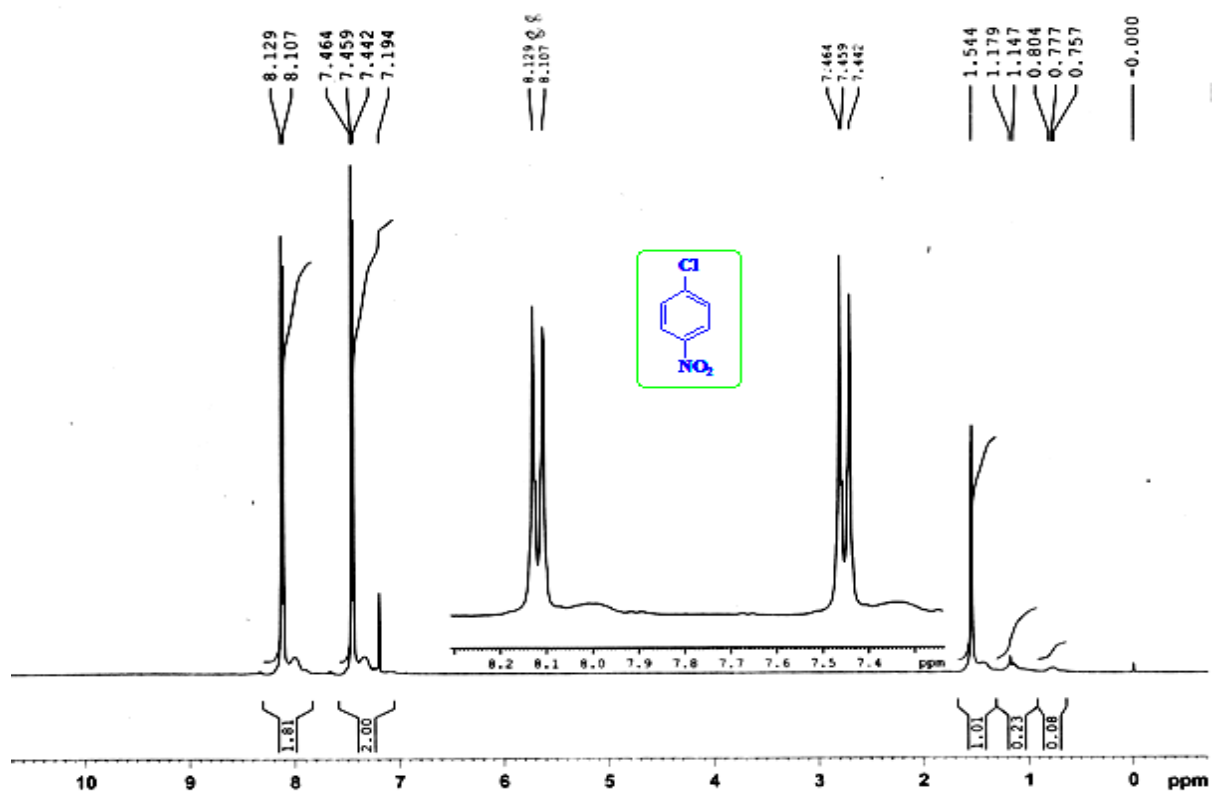

Fig. S9: <sup>1</sup>H-NMR spectrum of 4-chloro-nitrobenzene

## 2. High Performance Liquid Chromatography (HPLC) Spectra:

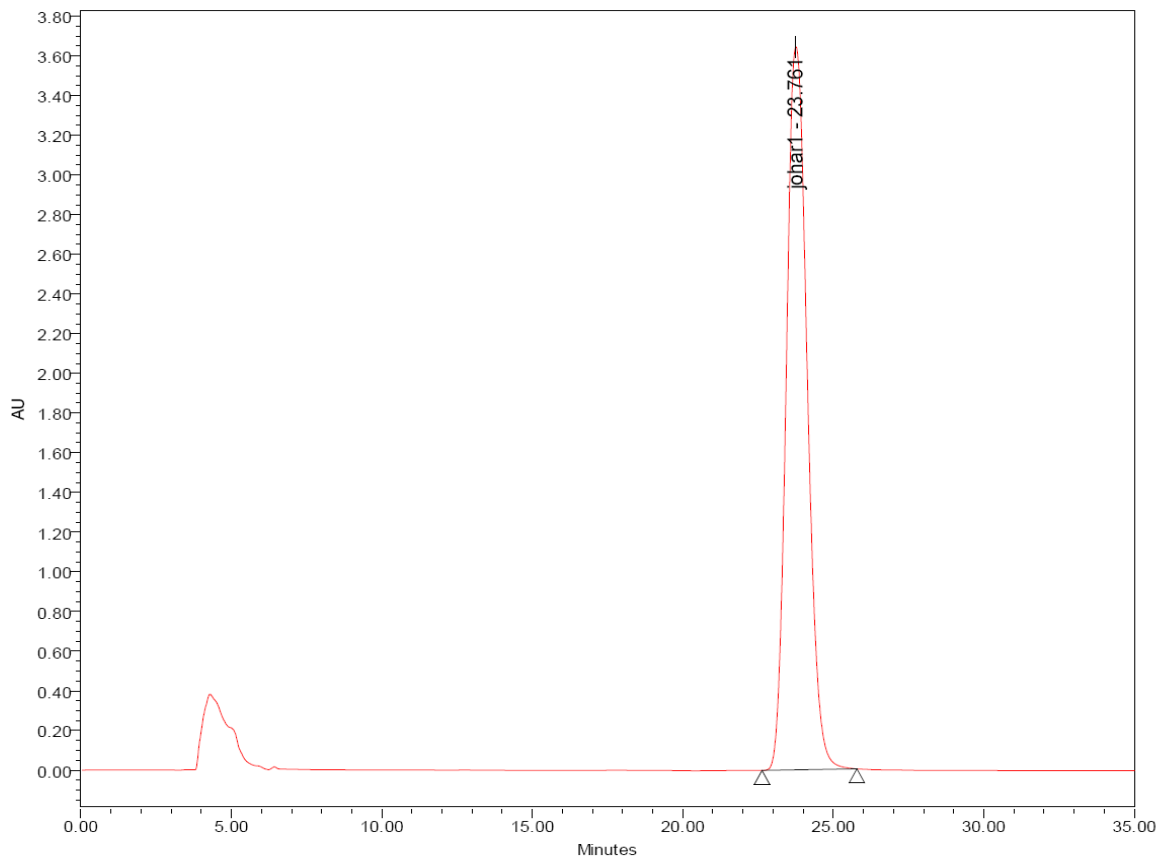

| Retention time (min) | Area      | % Area | Height  |
|----------------------|-----------|--------|---------|
| 23.761               | 175974010 | 100.00 | 3644882 |

**Fig. S10.** HPLC traces of 4-nitrotoluene

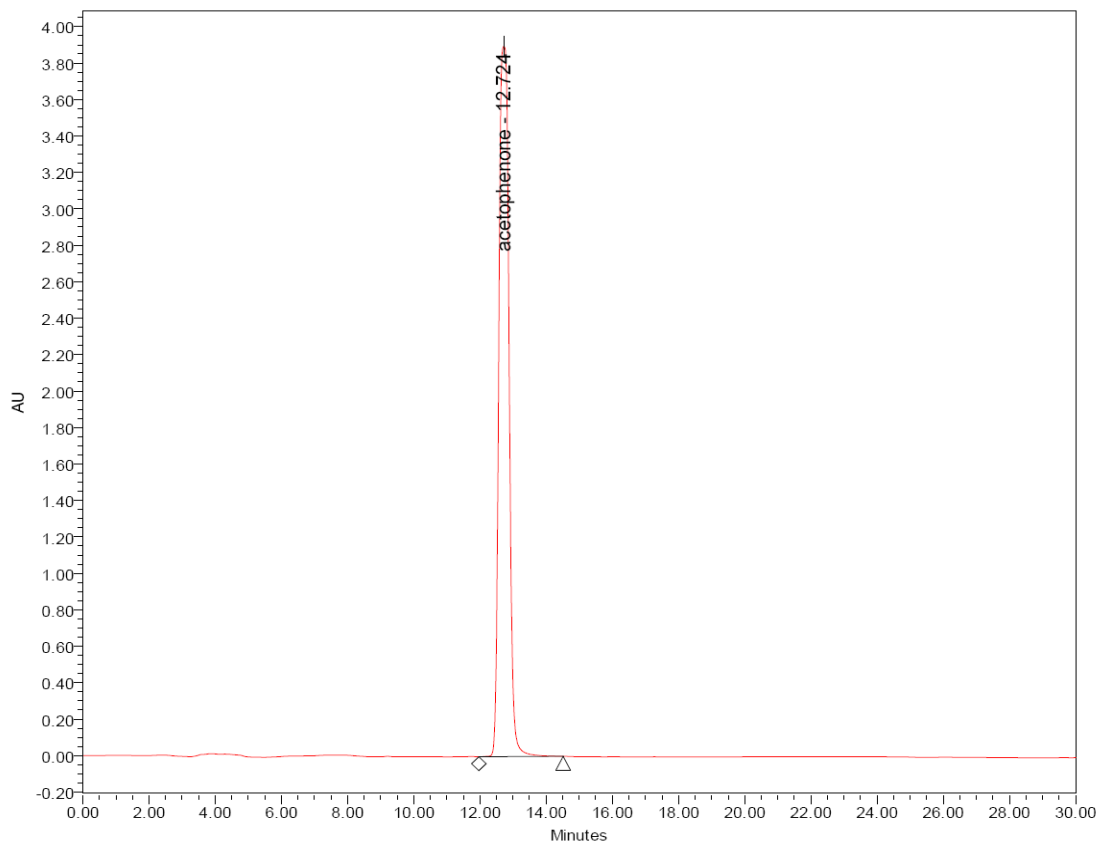

| <b>Retention time (min)</b> | <b>Area</b> | <b>% Area</b> | <b>Height</b> |
|-----------------------------|-------------|---------------|---------------|
| 12.742                      | 82809392    | 100.00        | 3898092       |

**Fig. S11.** HPLC traces of 3-nitroacetophenone

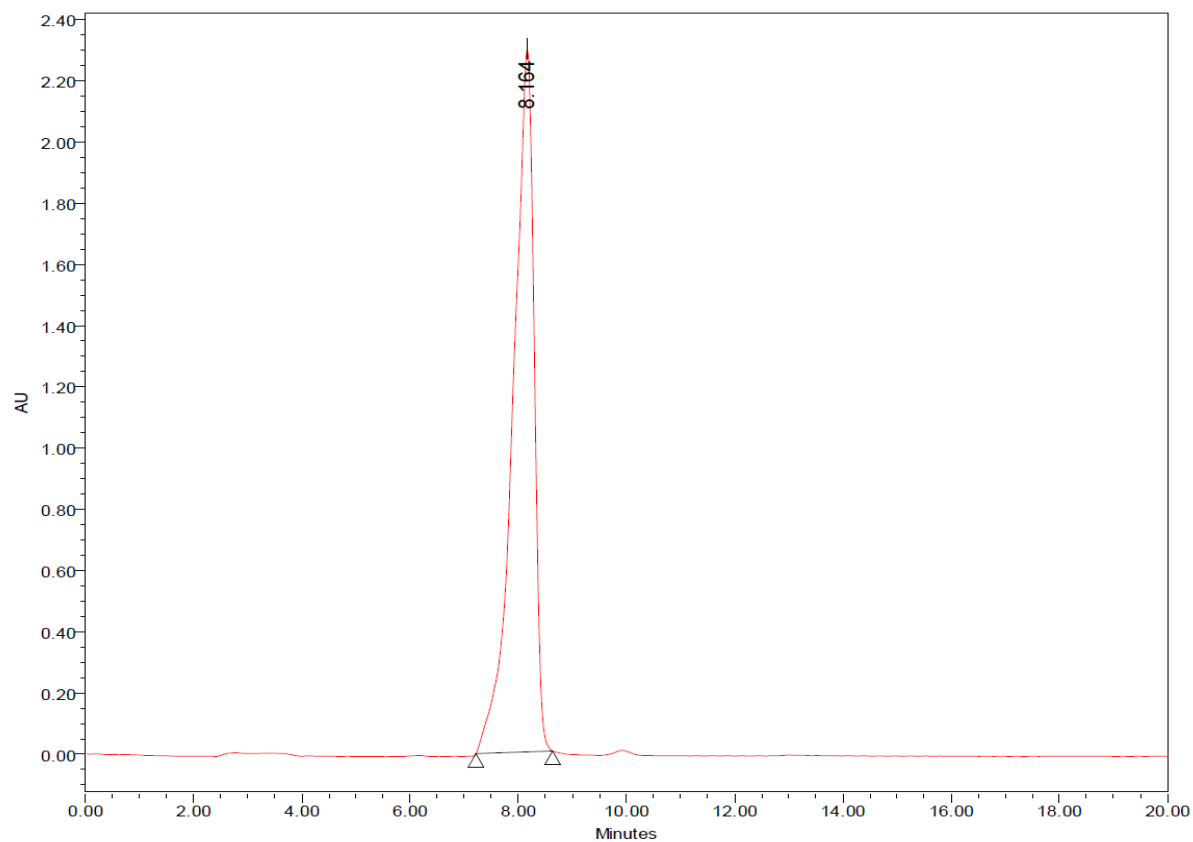

| <b>Retention time (min)</b> | <b>Area</b> | <b>% Area</b> | <b>Height</b> |
|-----------------------------|-------------|---------------|---------------|
| 8.164                       | 61597444    | 100.00        | 2297681       |

**Fig. S12.** HPLC traces of 4-nitrophenol
